# Supplementary material for: Engineered Lactococcus lactis Secreting IL-23 Receptor-Targeted REX Protein Blockers for Modulation of IL-23/Th17-Mediated Inflammation
Source: PubMed Central journal article supplement (PMC6560508; doi:10.3390/microorganisms7050152), 2019-05-27
Supplement: microorganisms-07-00152-s001.pdf [file microorganisms-07-00152-s001.pdf]

## Supplementary data

### Engineered *Lactococcus lactis* secreting IL-23 receptor-targeted REX protein blockers for modulation of IL-23/Th17-mediated inflammation

Tina Vida Plavec <sup>1,2</sup>, Milan Kuchař <sup>3</sup>, Anja Benko <sup>1,2</sup>, Veronika Lišková <sup>3</sup>, Jiří Černý <sup>4</sup>, Aleš Berlec <sup>1,2\*</sup> and Petr Malý <sup>3,\*</sup>

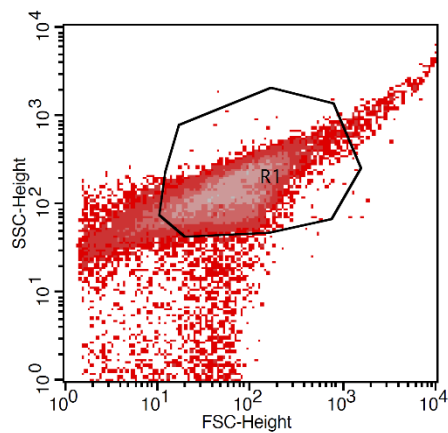

Figure S1. Representative SSC-FSC diagram for bacterial cells depicting gating strategy (R1).

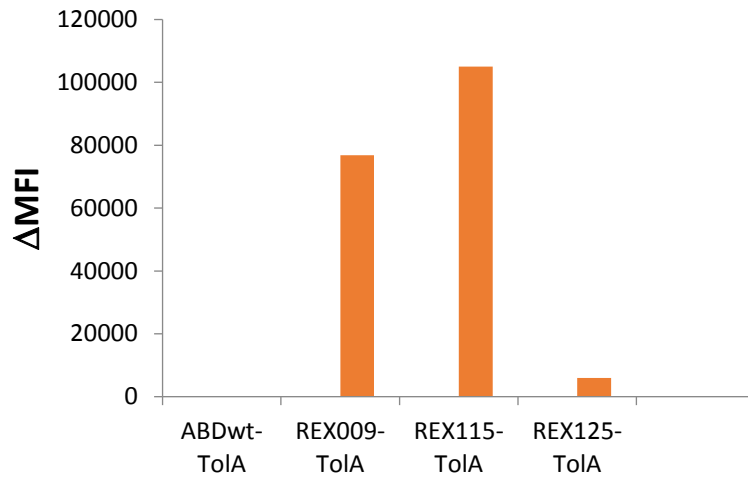

**Figure S2. Binding of REX proteins to mouse NIH-3T3 fibroblasts.** For the binding assay,  $2.5 \times 10^5$  NIH-3T3 cells were incubated with *in vivo* biotinylated His<sub>6</sub>-REX-TolA-AVI proteins or His<sub>6</sub>-ABDwt-TolA-AVI negative control (10  $\mu$ g/mL) for 30 min at 4 °C. The cell-bound proteins were stained with streptavidin-PE for 30 min at 4 °C and analyzed by flow cytometry.

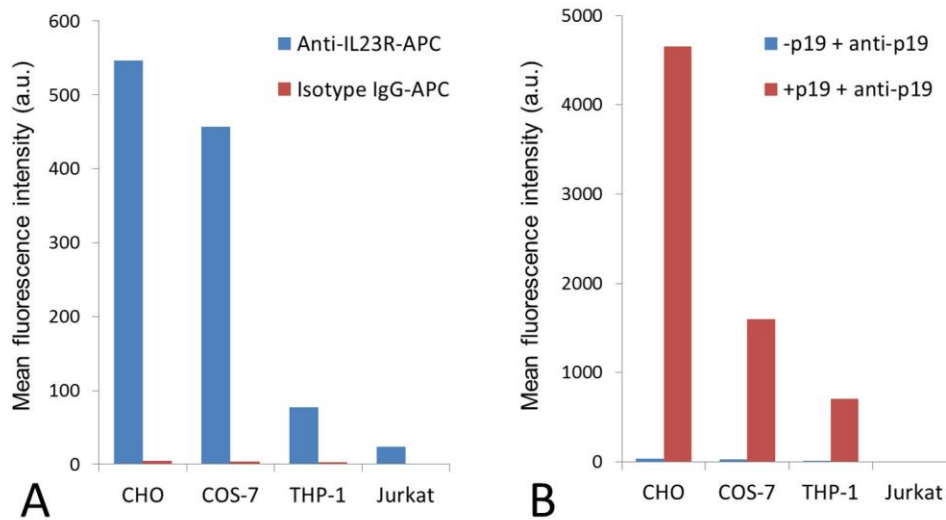

**Figure S3. Expression of IL-23R on cells of selected cell lines tested by flow cytometry.** For the binding assay,  $2.5 \times 10^5$  cells were incubated with anti-IL23R-APC antibody conjugate (Panel A, blue columns) or isotype IgG-APC as a negative control (red columns) and analyzed by flow cytometry. Binding of recombinant p19 protein to IL-23R-expressing cells was detected by flow cytometry using a mouse anti-IL-23 mAb goat anti-mouse IgG antibody sandwich labeled with Cy5 (panel B, red columns). Staining with the secondary IgG-Cy5 conjugate only as a negative control is shown in panel B as blue columns.

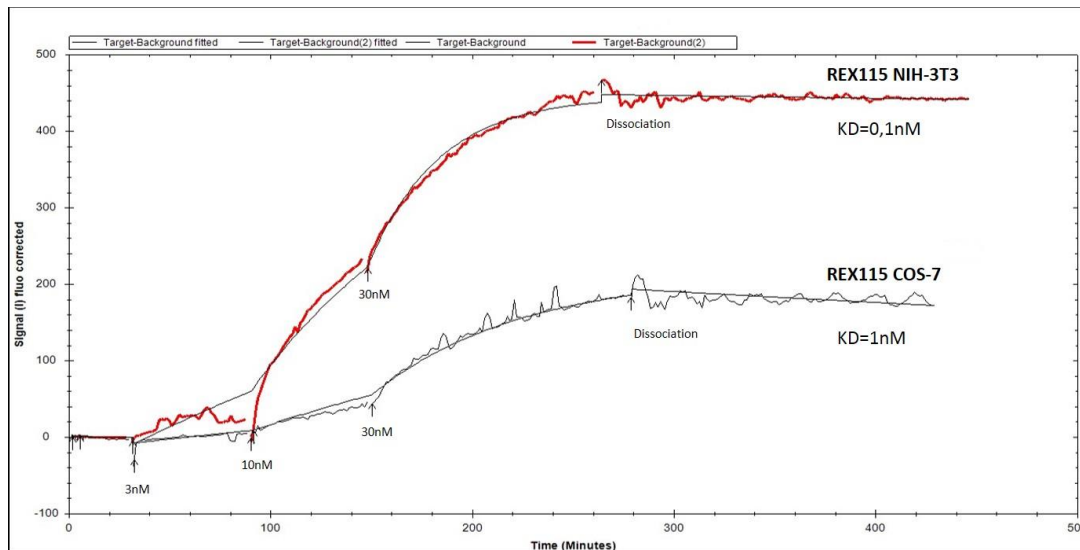

**Figure S4. Binding of REX115 to mouse NIH-3T3 cells and green monkey COS-7 cells tested by LigandTracer Green Line system.** For the binding assay,  $10^6$  cells were plated overnight on Petri dish and the next day, *in vivo* biotinylated His<sub>6</sub>-REX115-TolA-AVI protein was added into medium and incubated gradually at three different concentrations. Cell-bound protein was stained with streptavidin-APC conjugate and the measured binding curve was analyzed using the TraceDrawer software. Analysis of the binding affinities and rate-off kinetics indicated  $K_d$  values for NIH-3T3 cells as 0.1 nM and for COS-7 cells as 1 nM.
